# Supplementary material for: In silico-guided engineering of Pseudomonas putida towards growth under micro-oxic conditions
Source: Microb Cell Fact. 2019 Oct 22;18:179. doi: 10.1186/s12934-019-1227-5 (PMC6805499; doi:10.1186/s12934-019-1227-5)
Supplement: Supplementary file 2 — Additional file 2: Table S2. Primers used in this study to make the constructs described. [file 12934_2019_1227_MOESM2_ESM.xlsx]

## Sheet: Sheet1
Primer name	Forward Primer	Reverse primer
E. coli BW25113 L-aspartate oxidase for amplification and sequencing	ACTGGAGCTCCACCCCAGGAAGGAGGAAAAAACATATGAATACTCTCCCTGAACATTC	ACTGGGATCCTTATCTGTTTATGTAATGATTGCCGG
P. putida KT2440 L-aspartate oxidase for amplification and sequencing	ACTGGAGCTCCACCCCAGGAAGGAGGAAAAAACATATGAGCCAACAATTCCAACATGATGTCC	ACTGGGATCCTCAGAGCGGGTTAAGGATGGTG
E. coli BW25113 Acetate kinase for amplification and sequencing	ACTGCCTAGGCACCCCAGGAAGGAGGAAAAAACATATGTCGAGTAAGTTAGTACTG	ACTGGAATTCTtAGGCAGTCAGGCGGCTC
L. lactis dihydroorotate dehydrogenase for sequencing	ATATGAACAACTGGAACGCC	GCCGATGATCGGAATATCC
L. lactis Class II ribonucleotide triphosphate reductase for sequencing	TCAAGAACATGTTCGAGAACG	GCAACCGCTCACGTACAAGC
