# Supplementary material for: In silico-guided engineering of Pseudomonas putida towards growth under micro-oxic conditions
Source: Microb Cell Fact. 2019 Oct 22;18:179. doi: 10.1186/s12934-019-1227-5 (PMC6805499; doi:10.1186/s12934-019-1227-5)
Supplement: Supplementary file 3 — Additional file 3: Table S4. Development of oxygen gradient assay: testing different types of agar/agaroses. [file 12934_2019_1227_MOESM3_ESM.xlsx]

## Sheet: Sheet1
Number	Name	Brand	Composition
1	Bacto Agar DifcoTM	Difco	Agar
2	Sabouraud Agar	Sigma Aldrich	Peptone 10 g/L
			Agar 15 g/L
			D(+)-glucose 40 g/L
3	Rogosa agar	Sigma Aldrich	Yeast extract 5 g/L
			Agar 15 g/L
			Ammonium citrate 2 g/L
			Casein peptone 10 g/L
			Ferrous sulfate 0.034 g/L
			D(+)-glucose 20 g/L
			Magnesium sulfate 0.575 g/L
			Manganous sulfate 0.12 g/L
			Potassium dihydrogen phosphate 6 g/L
			Sodium acetate 15 g/L
4	Bile Aesculin Agar	Sigma Aldrich	Ox-bile 40 g/L
			Agar 15 g/L
			Aesculin 1 g/L
			Ferric citrate 0.5 g/L
			Meat extract 3 g/L
			Meat peptone 5 g/L
5	Cooke Rose Agar	Sigma Aldrich	Papic digest of soybean meal 5.00 g/L
			Dextrose 10.00 g/L
			Monopotassium phosphate 1.00 g/L
			Magnesium sulphate 0.50 g/L
			Rose bengal 0.05 g/L
			Agar 15.00 g/L
6	Agarose	Sigma Aldrich	Agarose
7	Mitis Salivarius Agar	Difco	Tryphan blue 0.075 g/L
			Agar 15 g/L
			Casein enzymatic hydrolysate 15.0 g/L
			Crystal violet 0.0008 g/L
			Dextrose 1.0 g/L
			Dipotassium phosphate 4.0 g/L
			Peptic digest of animal tissue 5.0 g/L
			Sucrose 50.0 g/L
8	Mueller-Hinton Agar	Difco	Starch 1.5 g/L
			Agar 17g/L
			Beef infusion solids 2.0 g/L
			Casein hydrolysate 17.5 g/L
9	Agar no1 Bacteriological	Sigma Aldrich	Agar
10	Potato Dextrose Agar	Sigma Aldrich	Potato extract 4 g/L
			Agar 15g/L
			Dextrose 20 g/L
