# Supplementary material for: In silico-guided engineering of Pseudomonas putida towards growth under micro-oxic conditions
Source: Microb Cell Fact. 2019 Oct 22;18:179. doi: 10.1186/s12934-019-1227-5 (PMC6805499; doi:10.1186/s12934-019-1227-5)
Supplement: Supplementary file 4 — Additional file 4: Table S5. Results of bacterial growth experiments in oxygen gradients testing different types of agar/agaroses. Oxygen gradients were prepared with LB medium + 0.05 g/l l-cysteine + 0.5 g/l sodium thioglycollate + 0.01 g/l resazurin + 6 g/l indicated agar/agarose. The gradients were placed overnight at 4 °C before inoculation to allow the agar/agarose to set. [file 12934_2019_1227_MOESM4_ESM.xlsx]

## Sheet: Sheet1
	Type of Agar	Solidification	Resazurin layer	Growth
1	Bacto Agar Difco	Completely solid	Very small on top	Dense bacterial growth at the top, continually less dense (clouded) at bottom
2	Sabouraud Agar	Not solid at all – maybe only in bottom of tube	Very small (seemingly clear of bacteriological growth) layer on top	Dense flocks of E. coli on top (except in Resazurin layer) Not growing less dense towards bottom of tube
3	Rogosa Agar	Almost completely solidified – gell-like consistency, presumably more solidified to bottom	Small pink layer on top, half clear half clouded with bacterial growth	Flocculated growth down growing less dense downwards
4	Bile Aesculin Agar	Gell-like consistency, presumably more solidified to bottom	Tiny pink overgrown layer on top	Flocculated growth down growing less dense
5	Cooke Rose Agar	Gell-like consistency, presumably more solidified to bottom	Resazurin still visible despite pink colour of agar type. Tiny pink overgrown resazurin layer	Flocculated growth down, whisps almost completely down. Whisps are vibrant pink, clearly visible (caused by resazurin)
6	Agarose	Completely solid	Tiny pink layer at top	Flocculated growth growing less dense downwards
7	Salivarius agar	Gell-like consistency, presumably more solidified to bottom	Small layer of (almost purple because of blueish agar) resazurin pink at top	Dense clouded growth at top growing less dense downwards
8	Mueller-Hinton agar	Gell-like consistency, presumably more solidified to bottom	Tiny pink layer at top	Dense flocculated growth at top growing less dense downwards
9	Agar no1 bacto	Completely solid	Quite large resazurin pink layer compared to others, as if no growth occurred	Only bacteriological growth where drop fell in, quite far downwards
10	Potato dextrose agar	Gell-like consistency, presumably more solidified to bottom	Very small pink resazurin layer	Dense flocculated growth at top, whispy growth downwards
