# Supplementary material for: In silico-guided engineering of Pseudomonas putida towards growth under micro-oxic conditions
Source: Microb Cell Fact. 2019 Oct 22;18:179. doi: 10.1186/s12934-019-1227-5 (PMC6805499; doi:10.1186/s12934-019-1227-5)
Supplement: Supplementary file 9 — Additional file 9: Analysis S2. Micro-electrode in oxygen gradient analysis. [file 12934_2019_1227_MOESM9_ESM.xlsx]

## Sheet: Sheet1
	M9																								LB
rawdata	Rogosa												Agarose												Rogosa												Agarose
depth (mm)	1 g/l		2 g/l		3 g/l		4 g/l		5 g/l		6 g/l		1 g/l		2 g/l		3 g/l		4 g/l		5 g/l		6 g/l		1 g/l		2 g/l		3 g/l		4 g/l		5 g/l		6 g/l		1 g/l		2 g/l		3 g/l		4 g/l		5 g/l		6 g/l
0	9.19	9.06	8.04	7.93	8.17	8.14	8.59	8.54	8.14	7.83	8.87	8.82	8.37	8.36	7.67	7.56	7.44	7.43	7.68	7.59	6.92	6.89	7.39	7.38	9.78	9.66	7.25	7.25	8.72	8.64	7.3	7.33	8.82	8.86	7.33	7.17	6.65	6.52	7.06	6.95	7.84	7.77	7.33	7.27	6.82	7.06	5.99	5.98
1	8.19	8.12	6.48	6.44	6.61	6.53	6.65	6.55	5.99	5.85	6.76	6.67	5.81	5.78	5.36	5.28	5.33	5.3	5.01	4.97	4.53	4.48	5.12	5.07	9.04	8.98	6.09	6.26	6.72	6.63	5.73	5.65	8.38	8.35	5.19	5.03	4.89	4.84	4.93	4.87	5.65	5.61	5.39	5.36	6.62	6.48	4.21	4.19
2	7.16	7.06	5.22	5.15	5.15	4.95	5.35	5.18	4.48	4.33	5.05	4.94	3.92	3.84	3.51	3.46	3.63	3.6	3.54	3.5	3	2.97	3.42	3.4	8.16	8.02	4.87	4.6	6.55	6.54	4.27	4.15	6.06	5.99	3.4	3.27	3.52	3.47	3.46	3.44	4.12	4.11	3.7	3.68	5.64	5.55	2.68	2.67
3	6.26	6.05	3.96	3.88	4.09	3.95	4.07	3.87	3.32	3.09	3.72	3.57	2.82	2.66	2.26	2.22	2.4	2.35	2.18	2.18	1.86	1.84	2.14	2.11	6.9	6.86	3.79	3.69	5.22	5.11	3.33	3.17	4.43	4.34	2.03	2	2.42	2.41	2.51	2.5	3	2.96	2.5	2.49	4.17	4.06	1.7	1.69
4	5.49	5.25	2.99	2.88	3.25	2.99	3.13	2.87	2.14	1.96	2.12	2.08	1.62	1.57	1.31	1.29	1.55	1.54	1.39	1.36	1.04	1.03	1.23	1.22	4.99	4.95	3.02	2.92	4.09	3.97	2.6	2.4	3.21	3.08	1.39	1.36	1.76	1.75	1.7	1.69	2.08	2.07	1.65	1.64	3.02	2.95	1.06	1.05
5	4.03	3.92	2.26	2.13	2.2	2	1.79	1.75	1.18	1.14	1.48	1.43	0.94	0.88	0.73	0.72	0.86	0.85	0.77	0.76	0.51	0.5	0.68	0.66	3.4	3.34	2.26	2.17	3.12	2.98	2.01	1.83	2.25	2.1	0.9	0.86	1.27	1.24	1.18	1.17	1.42	1.41	1.09	1.09	2.38	2.32	0.62	0.61
6	2.77	2.68	1.63	1.49	1.35	1.28	1.15	1.1	0.69	0.65	0.91	0.84	0.44	0.43	0.37	0.34	0.44	0.43	0.35	0.34	0.19	0.18	0.28	0.28	2.6	2.48	1.78	1.64	2.34	2.16	1.15	1.12	1.3	1.28	0.52	0.51	0.9	0.9	0.85	0.83	0.98	0.98	0.71	0.71	1.92	1.88	0.35	0.34
7	2.13	1.96	1.14	0.99	0.74	0.68	0.74	0.71	0.36	0.32	0.5	0.44	0.2	0.18	0.12	0.11	0.18	0.17	0.11	0.1	0.02	0	0.07	0.06	2.05	1.94	1.37	1.26	1.75	1.61	0.74	0.72	0.81	0.8	0.32	0.31	0.63	0.6	0.55	0.54	0.65	0.66	0.43	0.41	1.44	1.42	0.19	0.2
8	1.48	1.33	0.73	0.61	0.44	0.37	0.48	0.42	0.12	0.11	0.18	0.17	0.06	0.03	0	0	0.03	0.02	0	0	0	0	0	0	1.38	1.28	1.07	0.98	1.31	1.17	0.47	0.45	0.56	0.53	0.2	0.2	0.4	0.4	0.36	0.33	0.42	0.4	0.25	0.24	1.07	1.06	0.09	0.09
9	0.98	0.83	0.43	0.36	0.21	0.15	0.13	0.13	0.01	0	0.03	0.02	0	0	0	0	0	0	0	0	0	0	0	0	0.9	0.82	0.83	0.8	0.97	0.85	0.33	0.3	0.4	0.36	0.14	0.13	0.3	0.29	0.23	0.23	0.27	0.26	0.15	0.14	0.69	0.69	0.05	0.04
10	0.64	0.54	0.29	0.26	0.02	0.01	0.03	0.01	0	0	0	0	0	0	0	0	0	0	0	0	0	0	0	0	0.6	0.55	0.72	0.66	0.71	0.63	0.23	0.2	0.24	0.23	0.12	0.12	0.23	0.22	0.15	0.14	0.19	0.18	0.09	0.08	0.5	0.51	0.04	0.03
11	0.39	0.32	0.13	0.1	0.01	0	0	0	0	0	0	0	0	0	0	0	0	0	0	0	0	0	0	0	0.41	0.36	0.45	0.44	0.38	0.34	0.17	0.16	0.17	0.16	0	0	0.17	0.17	0.11	0.1	0.12	0.12	0.06	0.07	0.42	0.4	0	0
12	0.21	0.15	0.01	0	0	0	0	0	0	0	0	0	0	0	0	0	0	0	0	0	0	0	0	0	0.27	0.23	0.34	0.32	0.23	0.22	0.14	0.14	0.15	0.14	0	0	0.15	0.15	0.09	0.1	0.09	0.09	0.05	0.06	0.27	0.26	0	0
13	0.1	0.06	0	0	0	0	0	0	0	0	0	0	0	0	0	0	0	0	0	0	0	0	0	0	0.15	0.13	0.28	0.27	0.17	0.16	0	0	0	0	0	0	0	0	0	0	0	0	0	0	0.18	0.16	0	0
14	0.03	0.01	0	0	0	0	0	0	0	0	0	0	0	0	0	0	0	0	0	0	0	0	0	0	0.09	0.04	0.26	0.27	0.15	0.15	0	0	0	0	0	0	0	0	0	0	0	0	0	0	0.13	0.11	0	0
15	0	0	0	0	0	0	0	0	0	0	0	0	0	0	0	0	0	0	0	0	0	0	0	0	0	0	0	0	0	0	0	0	0	0	0	0	0	0	0	0	0	0	0	0	0.09	0.08	0	0
16	0	0	0	0	0	0	0	0	0	0	0	0	0	0	0	0	0	0	0	0	0	0	0	0	0	0	0	0	0	0	0	0	0	0	0	0	0	0	0	0	0	0	0	0	0.06	0.05	0	0
17	0	0	0	0	0	0	0	0	0	0	0	0	0	0	0	0	0	0	0	0	0	0	0	0	0	0	0	0	0	0	0	0	0	0	0	0	0	0	0	0	0	0	0	0	0.04	0.04	0	0
18	0	0	0	0	0	0	0	0	0	0	0	0	0	0	0	0	0	0	0	0	0	0	0	0	0	0	0	0	0	0	0	0	0	0	0	0	0	0	0	0	0	0	0	0	0.03	0	0	0
19	0	0	0	0	0	0	0	0	0	0	0	0	0	0	0	0	0	0	0	0	0	0	0	0	0	0	0	0	0	0	0	0	0	0	0	0	0	0	0	0	0	0	0	0	0	0	0	0
20	0	0	0	0	0	0	0	0	0	0	0	0	0	0	0	0	0	0	0	0	0	0	0	0	0	0	0	0	0	0	0	0	0	0	0	0	0	0	0	0	0	0	0	0	0	0	0	0
	M9												LB
mean	Rogosa						Agarose						Rogosa						Agarose
depth (mm)	1 g/l	2 g/l	3 g/l	4 g/l	5 g/l	6 g/l	1 g/l	2 g/l	3 g/l	4 g/l	5 g/l	6 g/l	1 g/l	2 g/l	3 g/l	4 g/l	5 g/l	6 g/l	1 g/l	2 g/l	3 g/l	4 g/l	5 g/l	6 g/l
0	9.125	7.985	8.155	8.565	7.985	8.845	8.365	7.615	7.435	7.635	6.905	7.385	9.72	7.25	8.68	7.315	8.84	7.25	6.585	7.005	7.805	7.3	6.94	5.985
1	8.155	6.46	6.57	6.6	5.92	6.715	5.795	5.32	5.315	4.99	4.505	5.095	9.01	6.175	6.675	5.69	8.365	5.11	4.865	4.9	5.63	5.375	6.55	4.2
2	7.11	5.185	5.05	5.265	4.405	4.995	3.88	3.485	3.615	3.52	2.985	3.41	8.09	4.735	6.545	4.21	6.025	3.335	3.495	3.45	4.115	3.69	5.595	2.675
3	6.155	3.92	4.02	3.97	3.205	3.645	2.74	2.24	2.375	2.18	1.85	2.125	6.88	3.74	5.165	3.25	4.385	2.015	2.415	2.505	2.98	2.495	4.115	1.695
4	5.37	2.935	3.12	3	2.05	2.1	1.595	1.3	1.545	1.375	1.035	1.225	4.97	2.97	4.03	2.5	3.145	1.375	1.755	1.695	2.075	1.645	2.985	1.055
5	3.975	2.195	2.1	1.77	1.16	1.455	0.91	0.725	0.855	0.765	0.505	0.67	3.37	2.215	3.05	1.92	2.175	0.88	1.255	1.175	1.415	1.09	2.35	0.615
6	2.725	1.56	1.315	1.125	0.67	0.875	0.435	0.355	0.435	0.345	0.185	0.28	2.54	1.71	2.25	1.135	1.29	0.515	0.9	0.84	0.98	0.71	1.9	0.345
7	2.045	1.065	0.71	0.725	0.34	0.47	0.19	0.115	0.175	0.105	0.01	0.065	1.995	1.315	1.68	0.73	0.805	0.315	0.615	0.545	0.655	0.42	1.43	0.195
8	1.405	0.67	0.405	0.45	0.115	0.175	0.045	0	0.025	0	0	0	1.33	1.025	1.24	0.46	0.545	0.2	0.4	0.345	0.41	0.245	1.065	0.09
9	0.905	0.395	0.18	0.13	0.005	0.025	0	0	0	0	0	0	0.86	0.815	0.91	0.315	0.38	0.135	0.295	0.23	0.265	0.145	0.69	0.045
10	0.59	0.275	0.015	0.02	0	0	0	0	0	0	0	0	0.575	0.69	0.67	0.215	0.235	0.12	0.225	0.145	0.185	0.085	0.505	0.035
11	0.355	0.115	0.005	0	0	0	0	0	0	0	0	0	0.385	0.445	0.36	0.165	0.165	0	0.17	0.105	0.12	0.065	0.41	0
12	0.18	0.005	0	0	0	0	0	0	0	0	0	0	0.25	0.33	0.225	0.14	0.145	0	0.15	0.095	0.09	0.055	0.265	0
13	0.08	0	0	0	0	0	0	0	0	0	0	0	0.14	0.275	0.165	0	0	0	0	0	0	0	0.17	0
14	0.02	0	0	0	0	0	0	0	0	0	0	0	0.065	0.265	0.15	0	0	0	0	0	0	0	0.12	0
15	0	0	0	0	0	0	0	0	0	0	0	0	0	0	0	0	0	0	0	0	0	0	0.085	0
16	0	0	0	0	0	0	0	0	0	0	0	0	0	0	0	0	0	0	0	0	0	0	0.055	0
17	0	0	0	0	0	0	0	0	0	0	0	0	0	0	0	0	0	0	0	0	0	0	0.04	0
18	0	0	0	0	0	0	0	0	0	0	0	0	0	0	0	0	0	0	0	0	0	0	0.015	0
19	0	0	0	0	0	0	0	0	0	0	0	0	0	0	0	0	0	0	0	0	0	0	0	0
20	0	0	0	0	0	0	0	0	0	0	0	0	0	0	0	0	0	0	0	0	0	0	0	0
